# Supplementary material for: A p21-GFP zebrafish model of senescence for rapid testing of senolytics in vivo
Source: bioRxiv or medRxiv preprint supplement (doi:10.1101/2022.09.19.506911), 2022-09-19
Supplement: Supplementary file [file media-1.pdf]

# Extended Fig 1

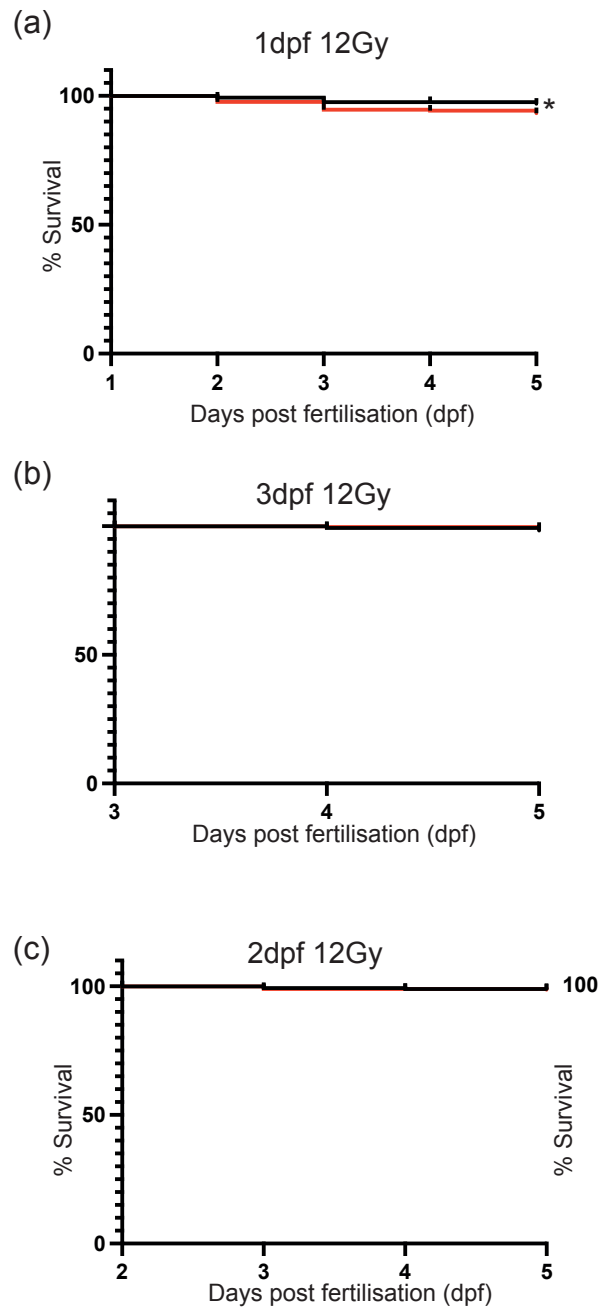

**Extended Figure 1. The dose of 12Gy Cs137 - $\gamma$ -Irradiation administered at 2dpf is optimal to limit toxicity in zebrafish larvae before 5dpf.** 12Gy Cs137 - $\gamma$ -Irradiation was given at 1dpf (b), 2dpf (c) or 3dpf (d) and survival examined at 5dpf by Kaplan-Meier analysis. Significant differences displayed as \*  $p < 0.05$ . Black line non irradiated fish and red line irradiated fish
